# Supplementary material
Source: publisher figshare collection journal article supplement (https://acs.figshare.com/ndownloader/files/18739880)
Supplement: Supplementary file 1 [file 18739880]

# Synthesis, structural, linear and nonlinear optical studies of inorganic-organic hybrid semiconductors (R- C<sub>6</sub>H<sub>4</sub>CHCH<sub>3</sub>NH<sub>3</sub>)<sub>2</sub>PbI<sub>4</sub>, (R=CH<sub>3</sub>, Cl)

**Mohammad Adnan<sup>a</sup>, Kotla Nageswara Rao<sup>a</sup>, Jitendra Nath Acharyya<sup>a</sup>, Dinesh Kumar<sup>b</sup>,  
Kshetra Mohan Dehury<sup>a</sup> and G. Vijaya Prakash<sup>a\*</sup>**

<sup>a</sup> Nanophotonics Lab, Department of Physics, Indian Institute of Technology Delhi, New Delhi 110016, India.

<sup>b</sup> Department of Chemistry, Indian Institute of Technology Delhi, New Delhi 110016, India.

## Supplementary Information

**Table S1.**

| Crystal Data                                               | MPEPI                                                            | CEPI                                                                             |
|------------------------------------------------------------|------------------------------------------------------------------|----------------------------------------------------------------------------------|
| <b>Empirical Formula</b>                                   | C <sub>18</sub> H <sub>26</sub> I <sub>4</sub> N <sub>2</sub> Pb | C <sub>16</sub> H <sub>22</sub> Cl <sub>2</sub> I <sub>4</sub> N <sub>2</sub> Pb |
| <b>Formula weight</b>                                      | 985.245 (g mol <sup>-1</sup> )                                   | 1028.62 (g mol <sup>-1</sup> )                                                   |
| <b>Temperature</b>                                         | 273K                                                             | 298K                                                                             |
| <b>Wavelength</b>                                          | 0.71073Å                                                         | 0.71073Å                                                                         |
| <b>Crystal System</b>                                      | Orthorhombic                                                     | Monoclinic                                                                       |
| <b>Space Group</b>                                         | Cmc2 <sub>1</sub>                                                | P 21/C                                                                           |
| <b>Unit cell dimensions</b>                                | a=32.544 (7) Å;b=9.316 (2) Å<br>c=8.6028(19) Å α=β=γ=90°         | a=16.200(3)Å;b=9.2695(2)Å<br>c=8.6314(13)Å β=96.738(2)°                          |
| <b>Volume</b>                                              | 2608.2 Å <sup>3</sup>                                            | 1287.19 (4)Å <sup>3</sup>                                                        |
| <b>Z</b>                                                   | 4                                                                | 2                                                                                |
| <b>Density (Calculated)</b>                                | 2.509mg m <sup>-3</sup>                                          | 2.652mg m <sup>-3</sup>                                                          |
| <b>Crystal</b>                                             | Rod shape with hexagonal cross-section                           | Fragment, Dark yellow                                                            |
| <b>Crystal Size</b>                                        | 0.1x0.1x0.1mm <sup>3</sup>                                       | 0.3x0.06x0.04mm <sup>-3</sup>                                                    |
| <b>Data Collection</b>                                     |                                                                  |                                                                                  |
| <b>Absorption Coefficient</b>                              | 11.208 mm <sup>-1</sup>                                          | 11.562mm <sup>-1</sup>                                                           |
| <b>F (000)</b>                                             | 1768                                                             | 920                                                                              |
| <b>Theta Range for data collection</b>                     | 2.274-28.288°                                                    | 2°-25°                                                                           |
| <b>Reflections Collected</b>                               | 14082                                                            | 2270                                                                             |
| <b>Independent reflections</b>                             | 3192                                                             | 2200                                                                             |
| <b>Completeness to θ=27.48°</b>                            | 99.5%                                                            | 99.99%                                                                           |
| <b>Absorption Correction</b>                               | Semi empirical from equivalents                                  | Multi Scan                                                                       |
| <b>Max. and Min Transmission</b>                           | 0.400 and 0.400                                                  | 0.111 and 0.059                                                                  |
| <b>Refinement Method</b>                                   | Full-matrix least squares on F <sup>2</sup>                      | Phi and Omega scans                                                              |
| <b>Data/Restraints/Parameter</b>                           | 3129/1/120                                                       | 2200/0/117                                                                       |
| <b>Final R-indices[F<sup>2</sup>&gt;2σ(F<sub>2</sub>)]</b> | R1=0.0288, wR2=0.0569                                            | 0.0253                                                                           |
| <b>R-indices (all data)</b>                                | R1=0.0330, wR2=0.0576                                            | 0.0267                                                                           |

| R-factor (%) | 2.88 | 2.53 |
|--------------|------|------|
|--------------|------|------|

Frames and data were collected at T= 298 K and 273K for MPEPI and CEPI respectively by  $\omega$ ,  $\psi$ , and  $2\theta$ -rotation at 10s per frame with SAINT. The measured intensities were reduced to  $F^2$  and corrected for absorption with SADABS.<sup>1</sup> Structure solution, refinement and data output were carried out with SHELXTL.<sup>2</sup> All the non-hydrogen atoms were refined anisotropically. All calculations were carried out using Wingx- crystallographic package.<sup>3</sup> Single crystal structure was examined using the Adsym subroutine of PLATON<sup>4</sup> to verify that no additional symmetry could be used to the model. The C–H hydrogen atoms were located in geometrically calculated positions by using a riding model. Hydrogen bonding interactions in the crystal lattice were calculated using SHELXTL and Diamond.<sup>2,5</sup> Molecular graphic images were created with Diamond.

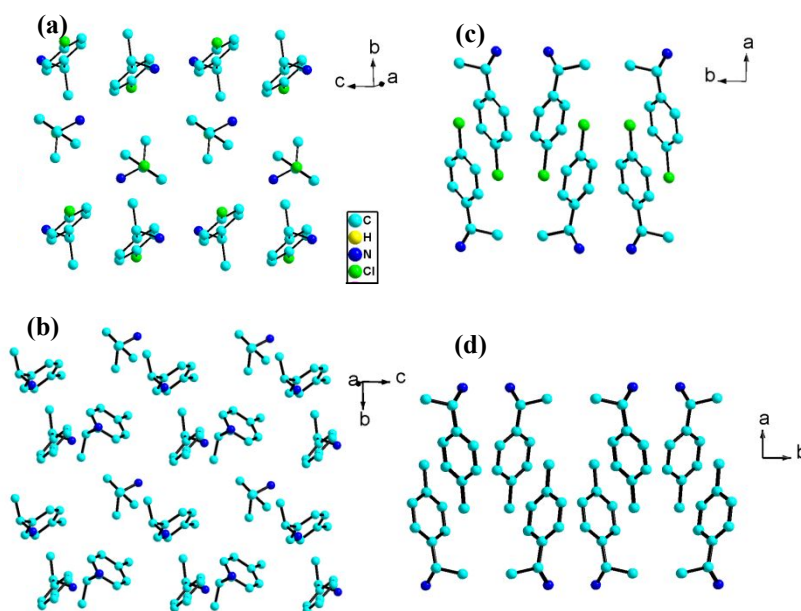

**Figure S1.** (a) Shows the double layer of organic ammonium in CEPI when viewed along a axis with a slight tilt (b) Shows the double layer view of organic ammonium cation when viewed along a axis. (c) And (d) presents a clear view of two different orientations of the organic in a single layer of CEPI and MPEPI respectively.

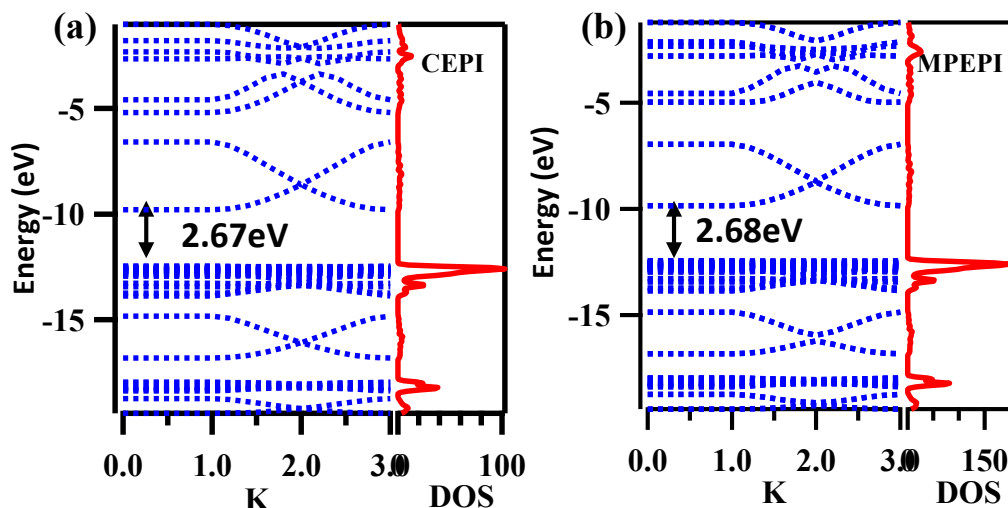

**Figure S2.** (a) & (b) Shows band structure diagram and band gap of CEPI and MPEPI respectively extracted from extended hückel tight binding calculations.

Extended hückel tight binding calculation's [CAESAR<sup>TM</sup>V2.0] are used to evaluate the band structure of both the IO hybrids from their crystallographic data. The estimated band gaps of the both CEPI and MPEPI are 2.66 eV and 2.68 eV respectively [Figure S2]. These results are in agreement with the exciton emission properties shown by them. In our earlier reports we tried correlating the band gap difference associate with these IO hybrid systems with the change in the Pb-I-Pb bond crumpling angle.<sup>6</sup> The difference in band gaps observed here and Pb-I-Pb bond crumpling in corresponding materials crystal structure are well in agreement.

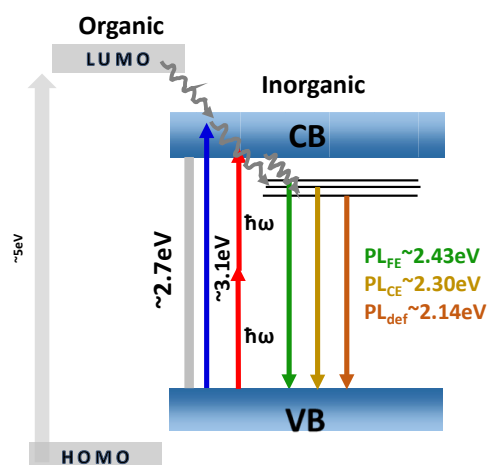

**Figure S3.** Schematic energy level representation of inorganic-organic hybrid semiconductor.

**Reference:**

- [1] Bruker Analytical X-ray Systems. SAINT-NT, version 6.04; *Bruker AXS*: Madison, WI, **2001**.
- [2] Bruker Analytical X-ray Systems. SHELXTL-NT, version 6.10; *Bruker AXS*: Madison, WI, **2000**.
- [3] Farrugia, L. WINGX, version 1.80.05; University of Glasgow: Glasgow, **2009**.
- [4] Spek, A. L. PLATON, A Multipurpose Crystallographic Tool; Utrecht University: Utrecht, the Netherlands, **2005**.
- [5] Brandenburg, K. DIAMOND, version 2.1e; Crystal Impact GbR: Bonn, Germany, **2001**.
- [6] Pradeesh, K.; Rao, K.N.; Vijaya Prakash, G. Synthesis, structural, thermal and optical studies of inorganic-organic hybrid semiconductors. *J. Appl. Phys.* **2013**, 113, 083523.
